# Supplementary material for: Tuning kinetics of SnS/Ni3S4 binary sulfides for high rate and long cyclic lithium-ion batteries
Source: Royal Society of Chemistry journal article supplement (doi:10.1039/d3nj03862a), 2023-12-29
Supplement: d3nj03862a1.pdf [file d3nj03862a1.pdf]

## Supplementary data

### **Tuning Kinetics of SnS/Ni<sub>3</sub>S<sub>4</sub> Binary Sulfides for High Rate and Long Cyclic Lithium-ion Batteries**

Muhammad Imran,<sup>a,b</sup> Tanveer Hussain Bokhari,<sup>b</sup> Yuefeng Wu,<sup>c</sup> Zohaib Rana,<sup>c</sup> Eman Gul,<sup>d</sup> Gul Rahman,<sup>d</sup> Amina Zafar,<sup>e</sup> Tahir Ali,<sup>f</sup> Saqib Javaid,<sup>g</sup> Shafqat Hussain,<sup>a</sup> Khan Maaz,<sup>a</sup> Shafqat Karim,<sup>a</sup> Mashkoor Ahmad,<sup>\*a</sup> Guolei Xiang,<sup>\*d</sup> Amjad Nisar<sup>\*a</sup>

<sup>a</sup> Nanomaterials Research Group, PD, PINSTECH, Islamabad 44000, Pakistan

<sup>b</sup> Department of Chemistry, GC University, Faisalabad 38000, Pakistan

<sup>c</sup> State Key Laboratory of Chemical Resource Engineering, Beijing University of Chemical Technology, Beijing 100029, PR China

<sup>d</sup> Institute of Chemical Sciences, University of Peshawar, Peshawar 25000, Pakistan

<sup>e</sup> CAFD, PINSTECH, Islamabad 44000, Pakistan

<sup>f</sup> MFMG, PD, PINSTECH, Islamabad 440000, Pakistan

<sup>g</sup>Theoretical Physics Division, PINSTECH, Islamabad 44000, Pakistan

\* Corresponding Authors at: Nanomaterials Research Group, PD, PINSTECH, Islamabad 44000, Pakistan & State Key Laboratory of Chemical Resource Engineering, Beijing University of Chemical Technology, Beijing 100029, PR China.

Email Addresses: [chempk@hotmail.com](mailto:chempk@hotmail.com); [nisarchem8@gmail.com](mailto:nisarchem8@gmail.com) (A. Nisar),

[xianggl@mail.buct.edu.cn](mailto:xianggl@mail.buct.edu.cn) (G. Xiang), [mashkoorahmad2003@yahoo.com](mailto:mashkoorahmad2003@yahoo.com) (M. Ahmad)

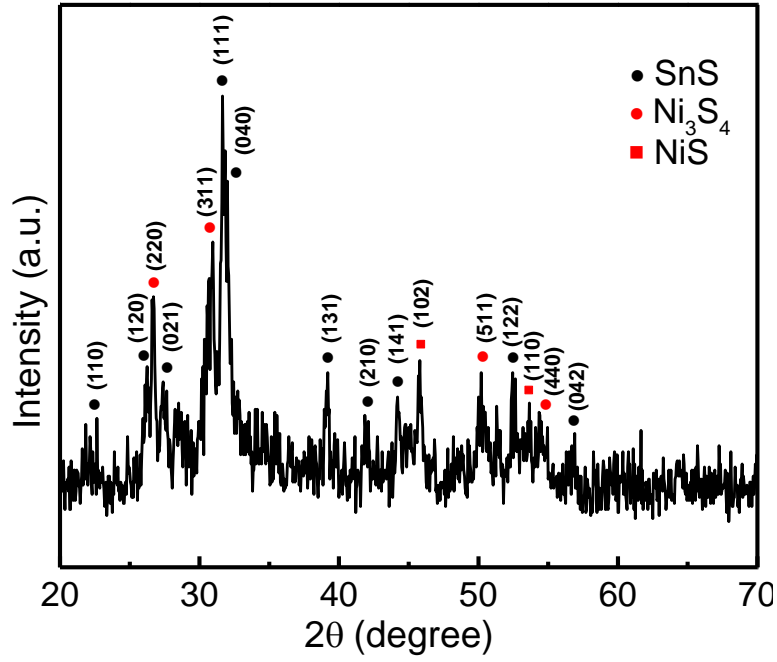

Figure S1. XRD pattern of SN-0.5.

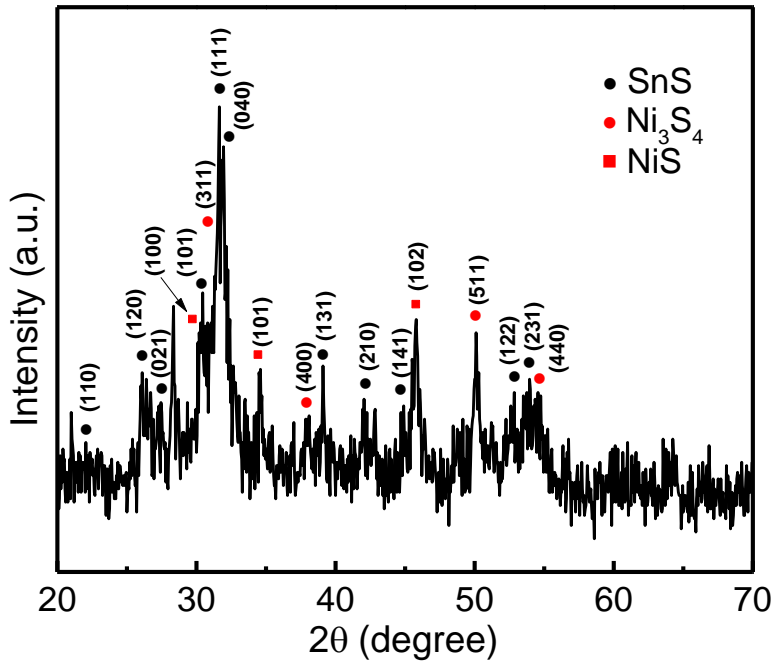

Figure S2. XRD pattern of SN-1.

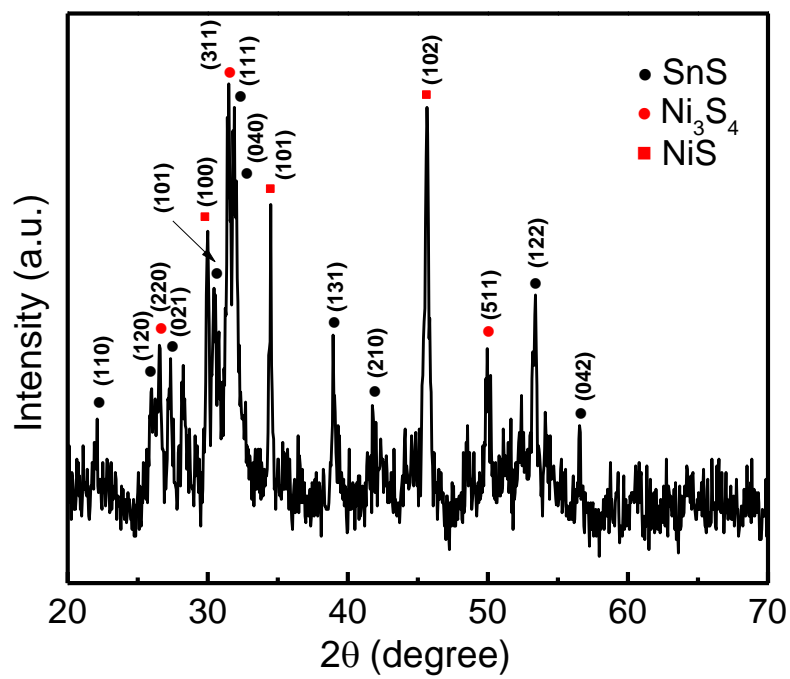

Figure S3. XRD pattern of SN-3.

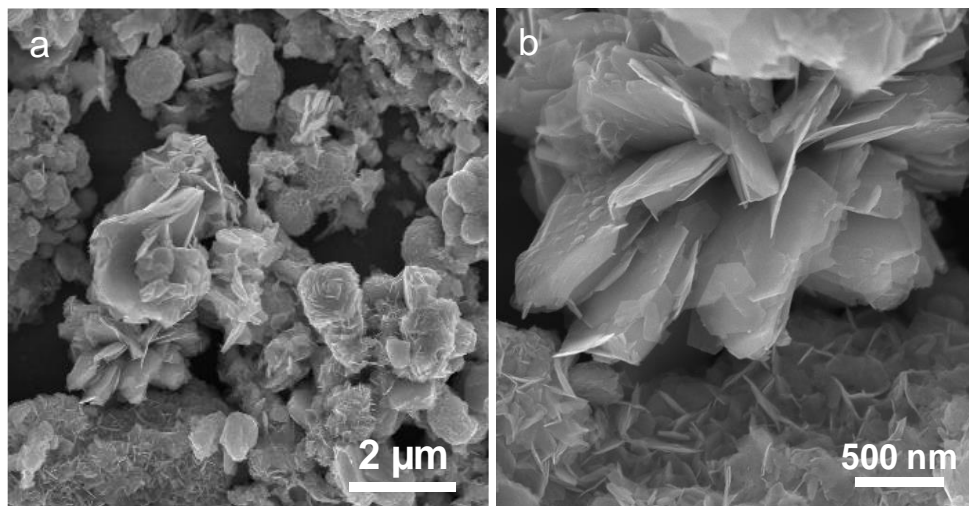

Figure S4. (a-b) SEM images of SN-1.

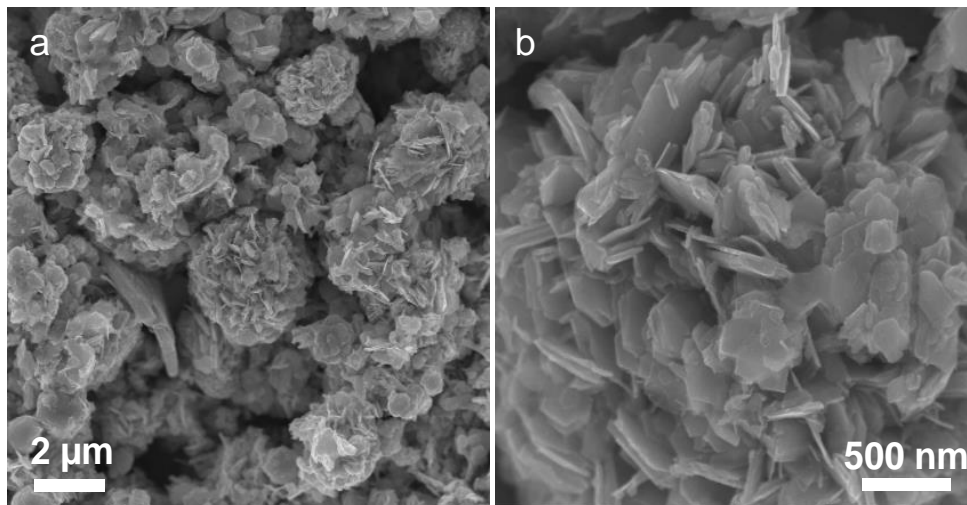

Figure S5. (a-b) SEM images of SN-0.5.

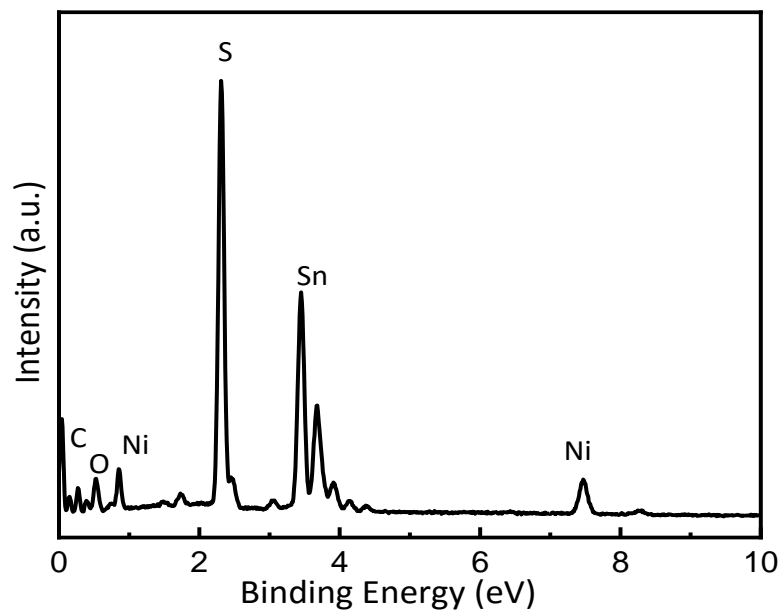

Figure S6. EDX spectrum of SN-1 binary nanocomposite.

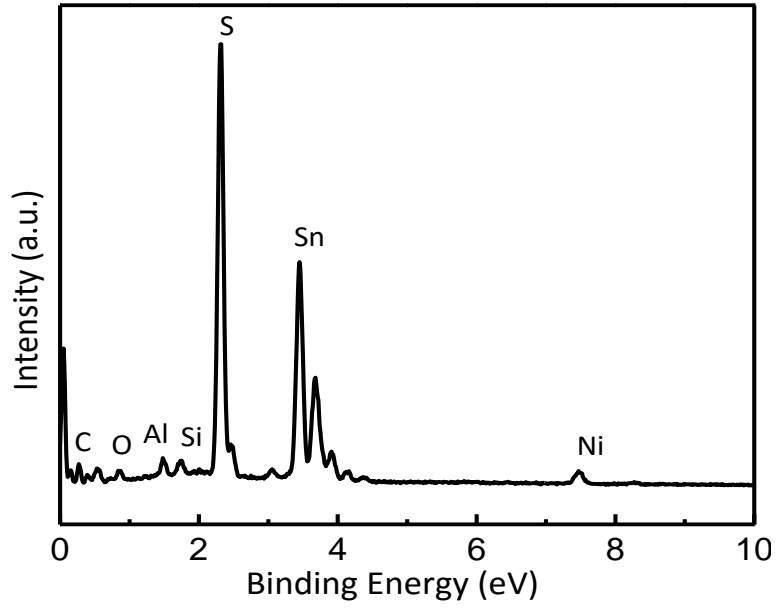

Figure S7. EDX spectrum of SN-0.5 binary nanocomposite.

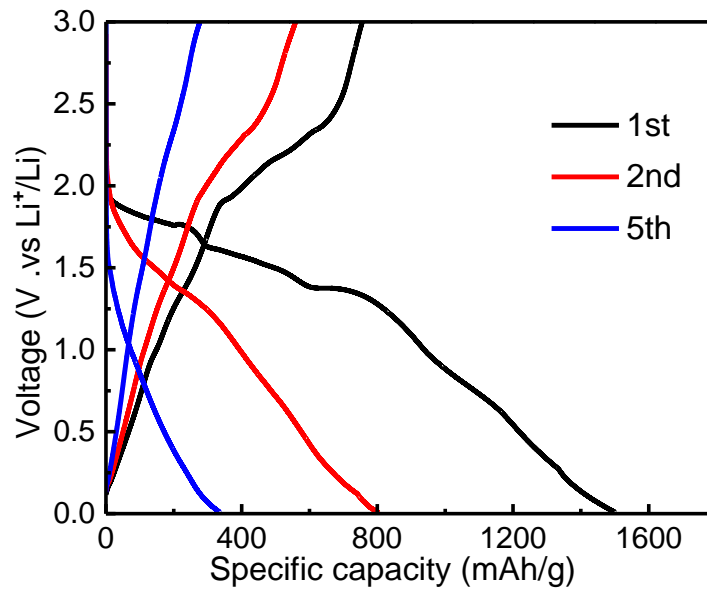

Figure S8. Galvanostatic charge/discharge profile for 1st, 2nd and 5th cycles of SnS.

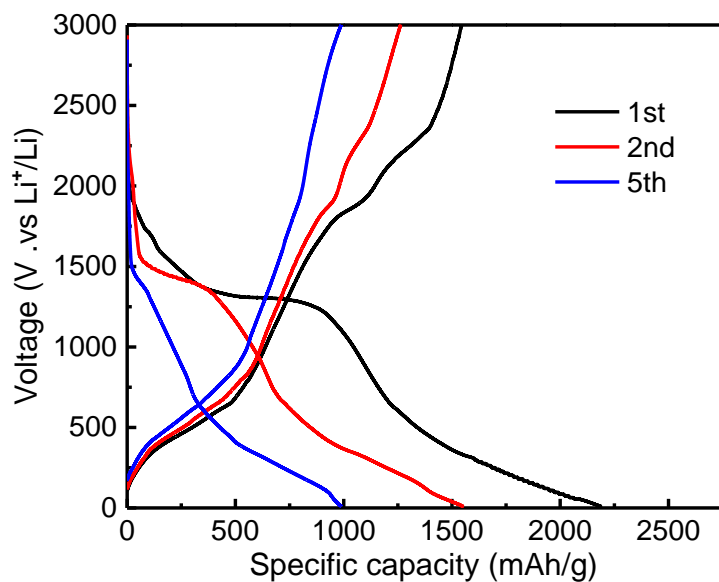

Figure S9. Galvanostatic charge/discharge profile for 1st, 2nd and 5th cycles of SN-1 binary composite.

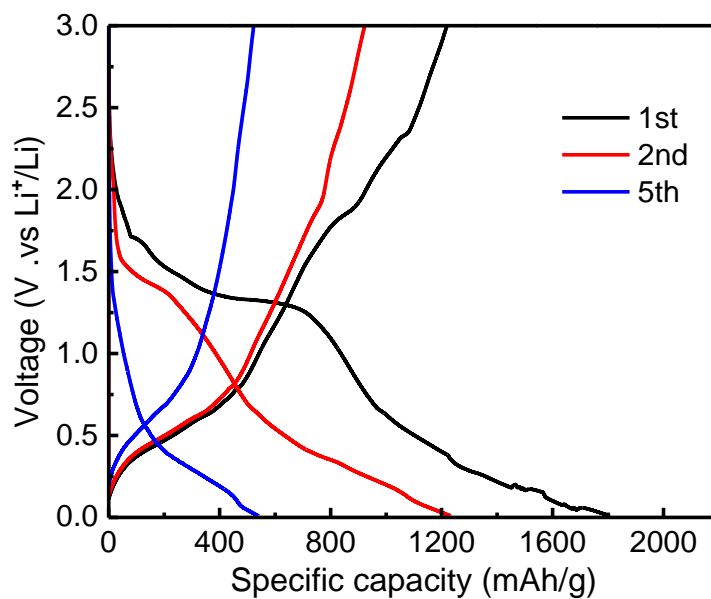

Figure S10. Galvanostatic charge/discharge profile for 1st, 2nd and 5th cycles of SN-0.5 binary composite.

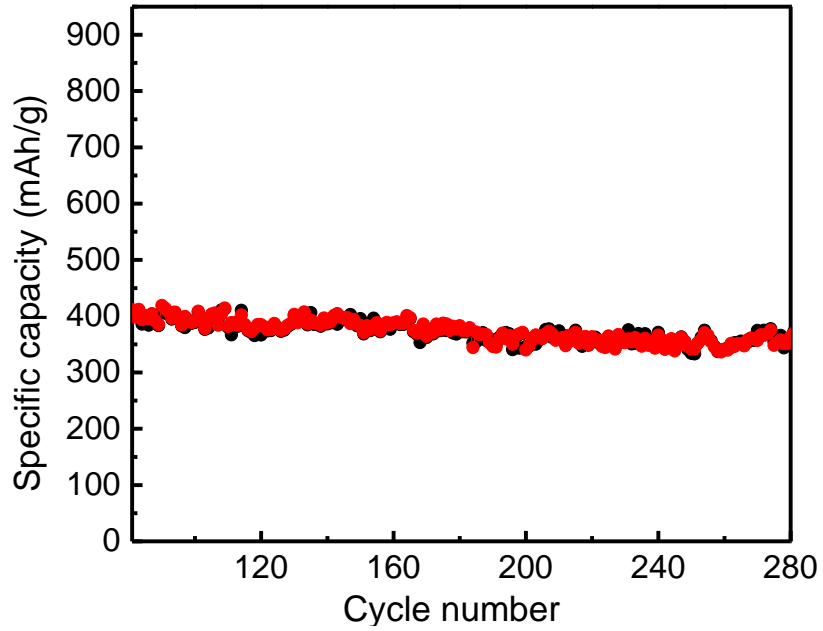

Figure S11. Cyclic performance of the SN-2 binary nanocomposite up to 280 cycles.

**Table: S1** EIS fitting parameters of the SnS, SN-0.5, SN-1 and SN-2 binary composite electrodes.

| Sample ID | $R_{ct}$ ( $\Omega$ ) |
|-----------|-----------------------|
| SnS       | 118.7                 |
| SN-0.5    | 100.7                 |
| SN-1      | 83.16                 |
| SN-2      | 78.27                 |

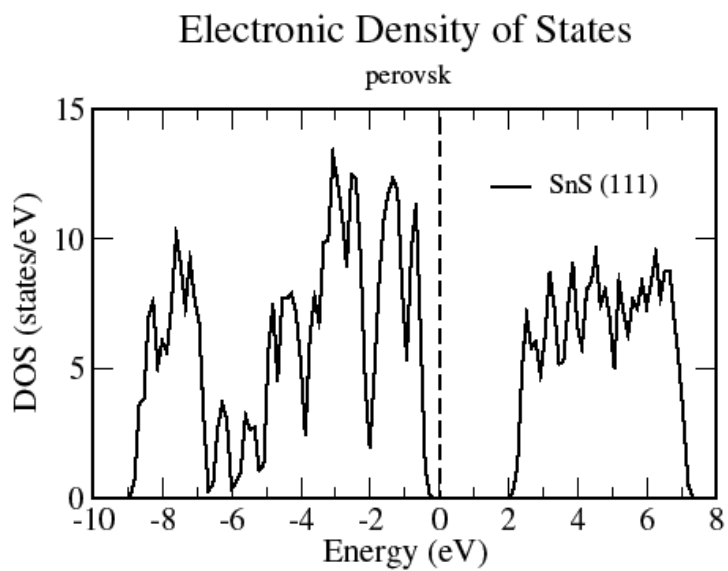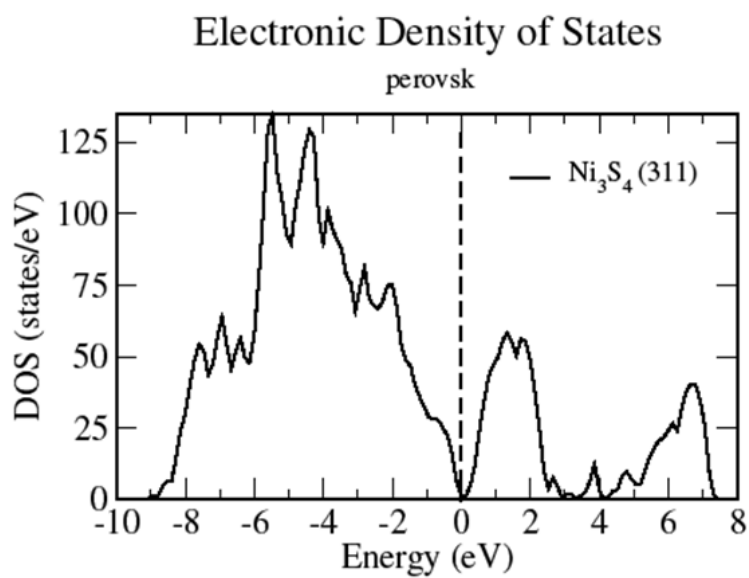

Figure S12. Comparison of electronic structure of SnS (111) and Ni<sub>3</sub>S<sub>4</sub> (311) surfaces calculated with hybrid HSE06 functional
